# Supplementary material for: Pathway-dependent re-assembly of dual-responsive ABC terpolymer in water
Source: Royal Society of Chemistry journal article supplement (doi:10.1039/c2sm07063d), 2012-01-01
Supplement: c2sm07063d.pdf [file c2sm07063d.pdf]

Supporting Information of Manuscript Entitled with  
**Pathway-Dependent Re-assembly of Dual-Responsive ABC  
Terpolymer in Water**

Chunhui Luo, Yu Liu, and Zhibo Li\*.

*Beijing National Laboratory for Molecular Sciences (BNLMS), Institute of Chemistry, Chinese  
Academy of Sciences, Beijing 100190, China.*

Email: [zbli@iccas.ac.cn](mailto:zbli@iccas.ac.cn)

**Table S1** Summary of copolymer molecular weights and compositions.

| Sample | $[M]_0/[macro-CTA]_0$ | $^aConv. (%)$ | DP | PDI  | $M_n(GPC)/kDa$ | $M_n(NMR)/kDa$ |
|--------|-----------------------|---------------|----|------|----------------|----------------|
| EB     | 30                    | 93            | 28 | 1.09 | 5.6            | 6.2            |
| EBD    | 35                    | 92            | 32 | 1.14 | 12.6           | 11.2           |

a) Calculated by  $^1H$  NMR in  $CDCl_3$ .

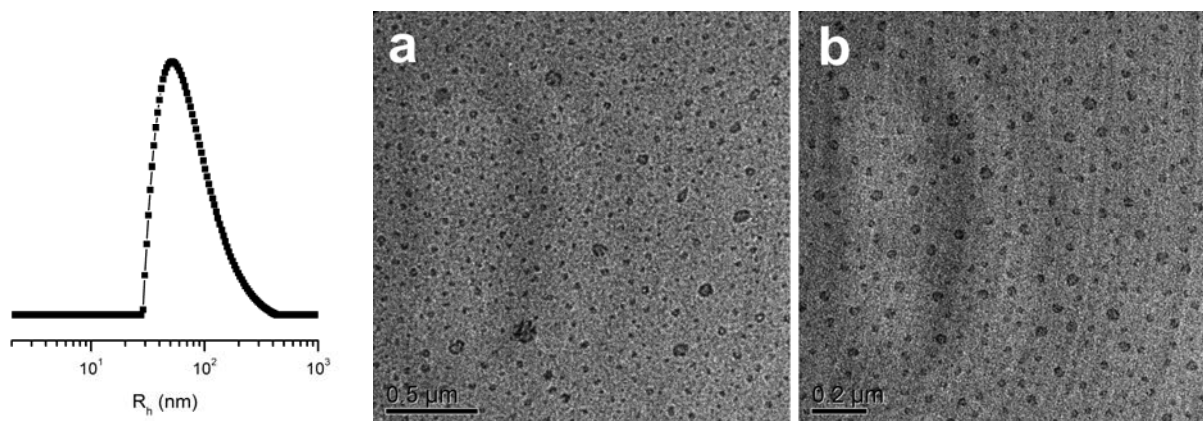

**Figure S1.** DLS results (left) and TEM images (right) of aggregates formed from 0.1 wt% PEG<sub>45</sub>-*b*-PnBMA<sub>28</sub> diblock aqueous solution at RT and pH=7 with an angle of 90°.

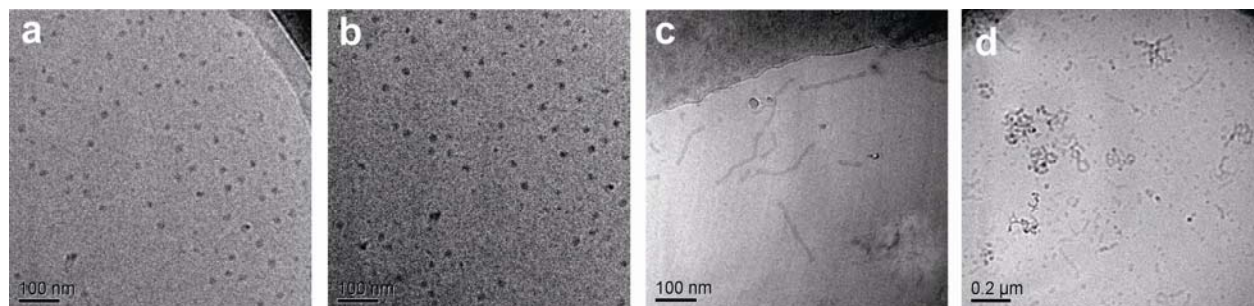

**Figure S2.** CryoTEM images of aggregates formed from 0.1 wt% EBD terpolymer aqueous solution: (a) pH=4, (b) pH=6, (c) pH=10, and (d) pH=12 in RT.

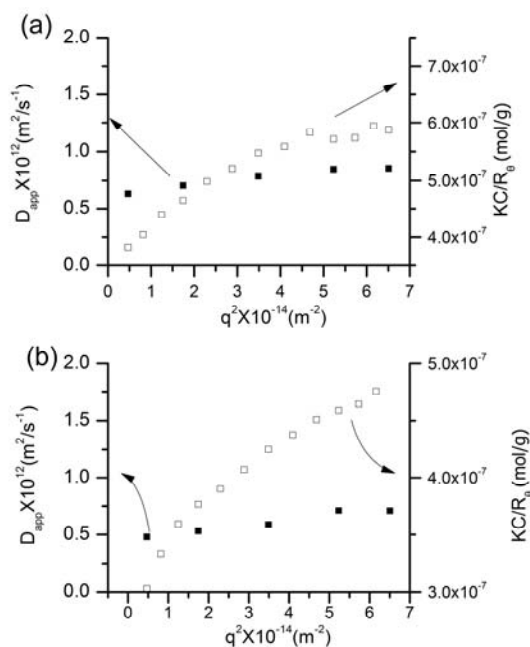

**Figure S3.** Angular dependent DLS (solid) and SLS (open) measurements performed on EBD aqueous solution (0.1-wt %) at (a) pH=8 and (b) pH=10 at RT.

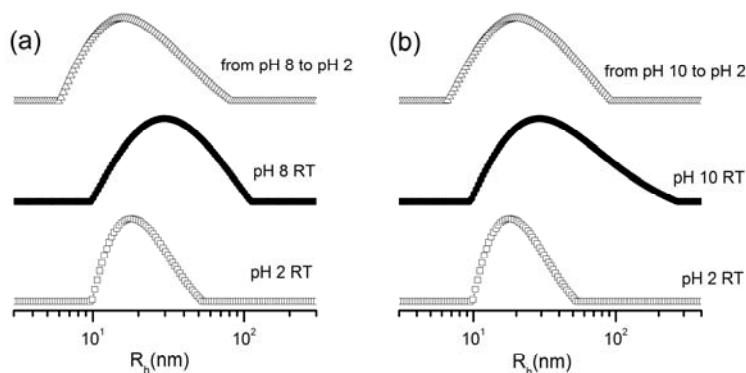

**Figure S4.** Apparent size distributions of aggregates formed from 0.1-wt% EBD terpolymer aqueous solution upon pH variations in RT at an angle of 90°.

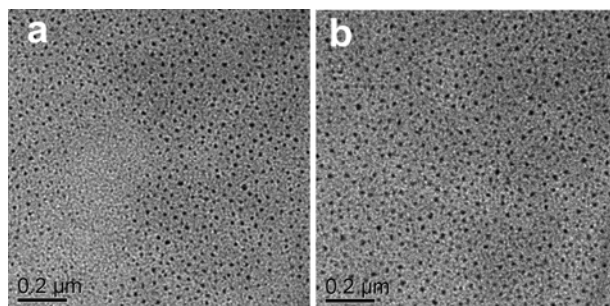

**Figure S5.** TEM images of aggregates formed from 0.1-wt% EBD terpolymer aqueous solution after adjusting solution from (a) pH = 8 to pH=2, and (b) from pH=10 to pH 2 at RT.

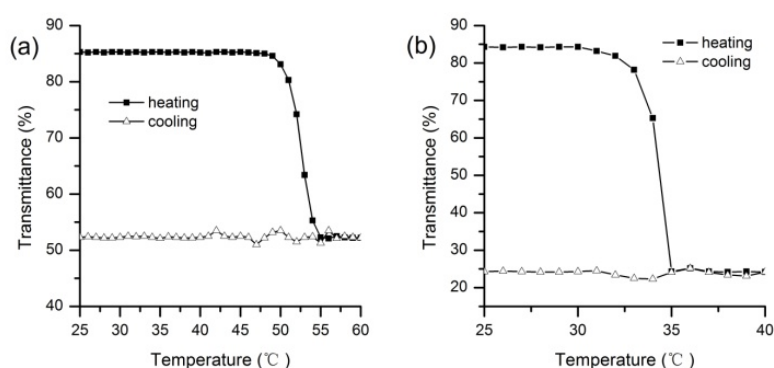

**Figure S6.** Transmittance of 0.1-wt% EBD terpolymer aqueous solution at (a) pH=8 and (b) pH =10 in a heating/cooling cycle with a heating rate of 1 °C /min.

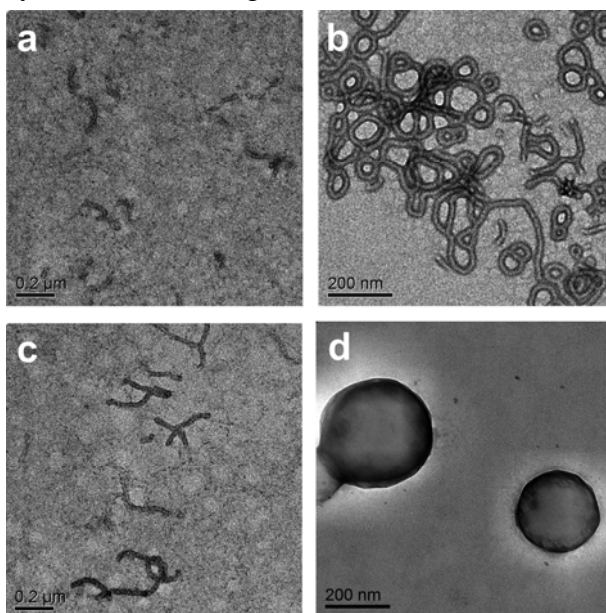

**Figure S7.** TEM image of of EBD terpolymer aggregates with pH 8 after heating at 55 °C for (a) 0 hour, (b) 1 hour and EBD terpolymer aggregates with pH 10 after heating at 35 °C for (c) 0 hour, (d) 1 hour (stained with uranyl acetate).

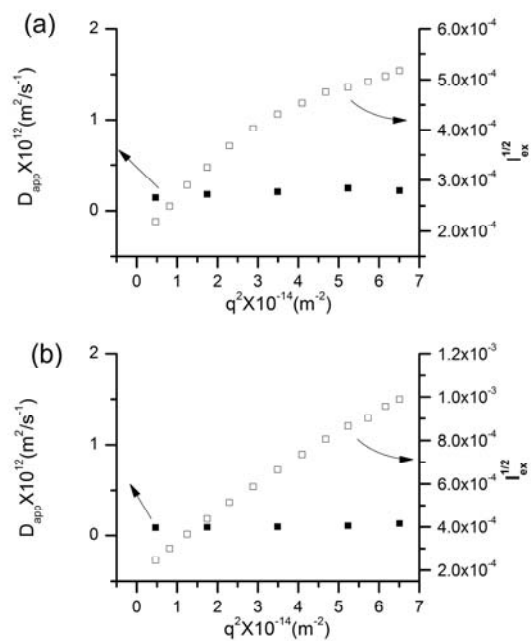

**Figure S8.** Angular dependent DLS (solid) and SLS (open) measurements performed on EDB solution (0.1 wt %) in RT after heating at (a) 55 °C with pH=8 and (b) 35 °C with pH=10.

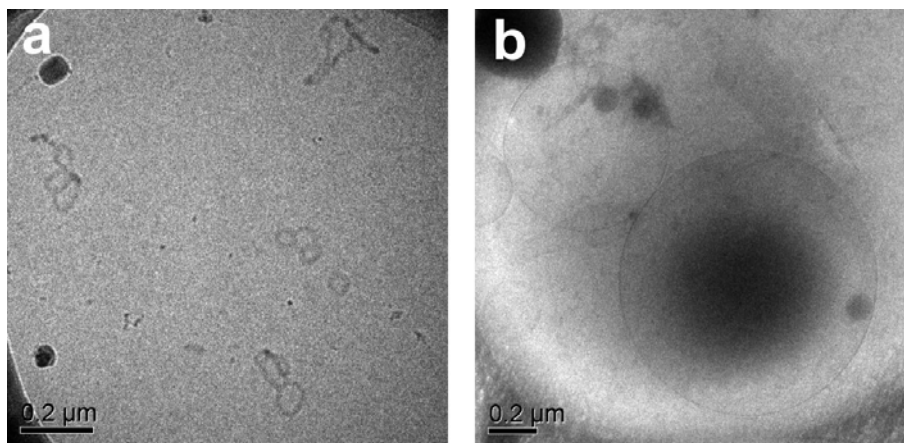

**Figure S9.** CryoTEM images of toroids and vesicles after 2 months' storage in RT.



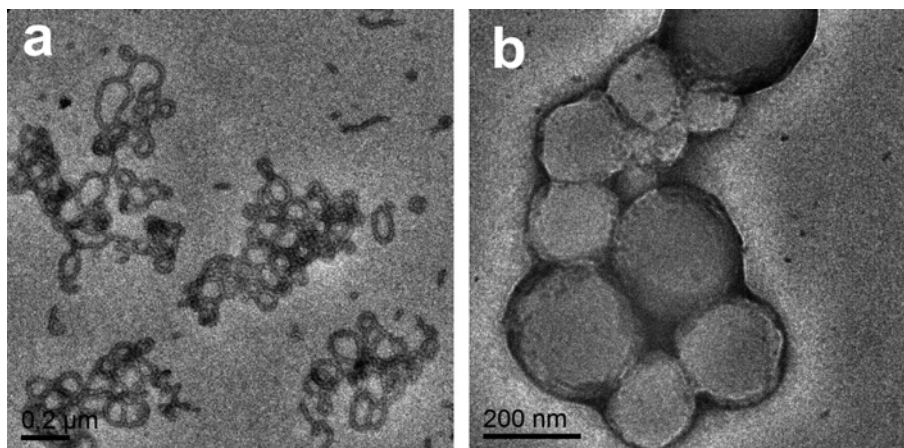

**Figure S10.** TEM images of assemblies formed EBD solutions after first round of thermal annealing: **(a)** the solution pH was changed from 2 to 8 followed by annealing at 55 ° for one hour, EBD micelle repeated the morphology transition from sphere to cylinder and then to toroid. **(b)** the solution pH was changed from 2 to 10 followed by annealing at 35 ° for one hour, EBD micelle repeated the morphology transition from sphere to cylinder and then to vesicles. (stained with uranyl acetate).

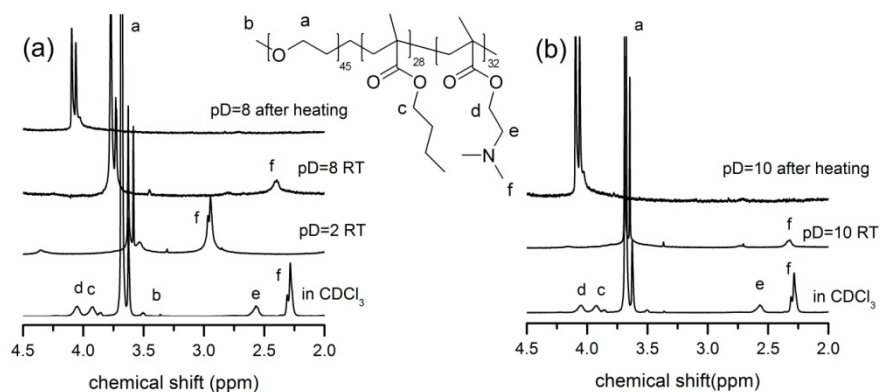

**Figure S11.**  $^1\text{H-NMR}$  spectra of 0.1 wt% EBD terpolymer in (a)  $\text{CDCl}_3$ ,  $\text{D}_2\text{O}$  with pD 2, pD 8 in RT, pD 8 after heating at 55 °C, (b) pD 10 in RT and after heating at 35 °C.

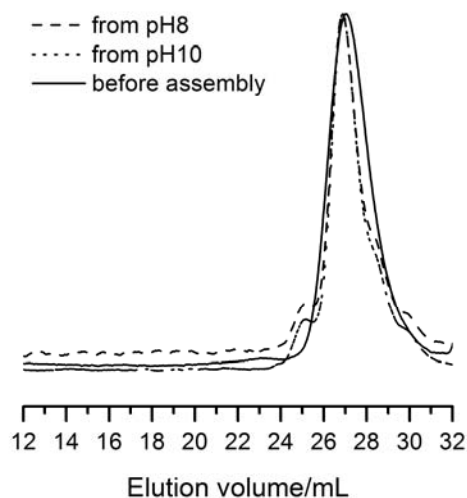

**Figure S12.** GPC traces of EBD after a transition cycle.

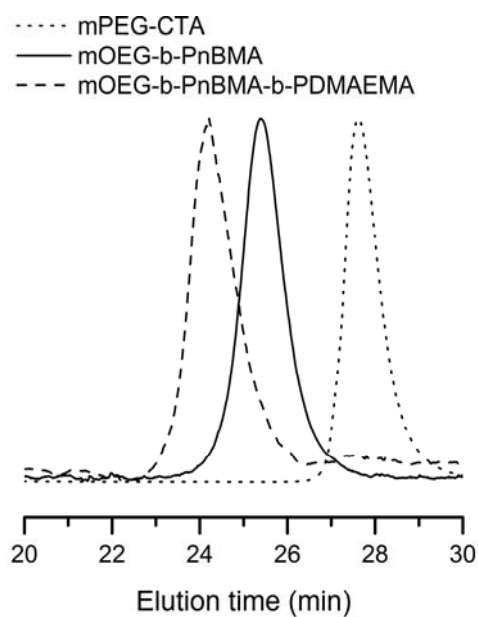

**Figure S13.** GPC traces of mPEG-CTA ( $M_n=3500$ , PDI=1.05), EB diblock ( $M_n=13800$ , PDI=1.08), and EBD triblock ( $M_n=35400$ , PDI=1.13) copolymers in THF.

(GPC was performed by a set of a Waters 515 HPLC pump and a Waters 2414 refractive index detector. THF was used as an eluent at a flow rate of 1.0 mL/min at 35 °C. Polystyrene standards were used for the calibration.)
